# Supplementary material for: Characterisation and comparison of bacterial communities on reverse osmosis membranes of a full-scale desalination plant by bacterial 16S rRNA gene metabarcoding
Source: PubMed Central journal article supplement (PMC5476683; doi:10.1038/s41522-017-0021-6), 2017-06-19

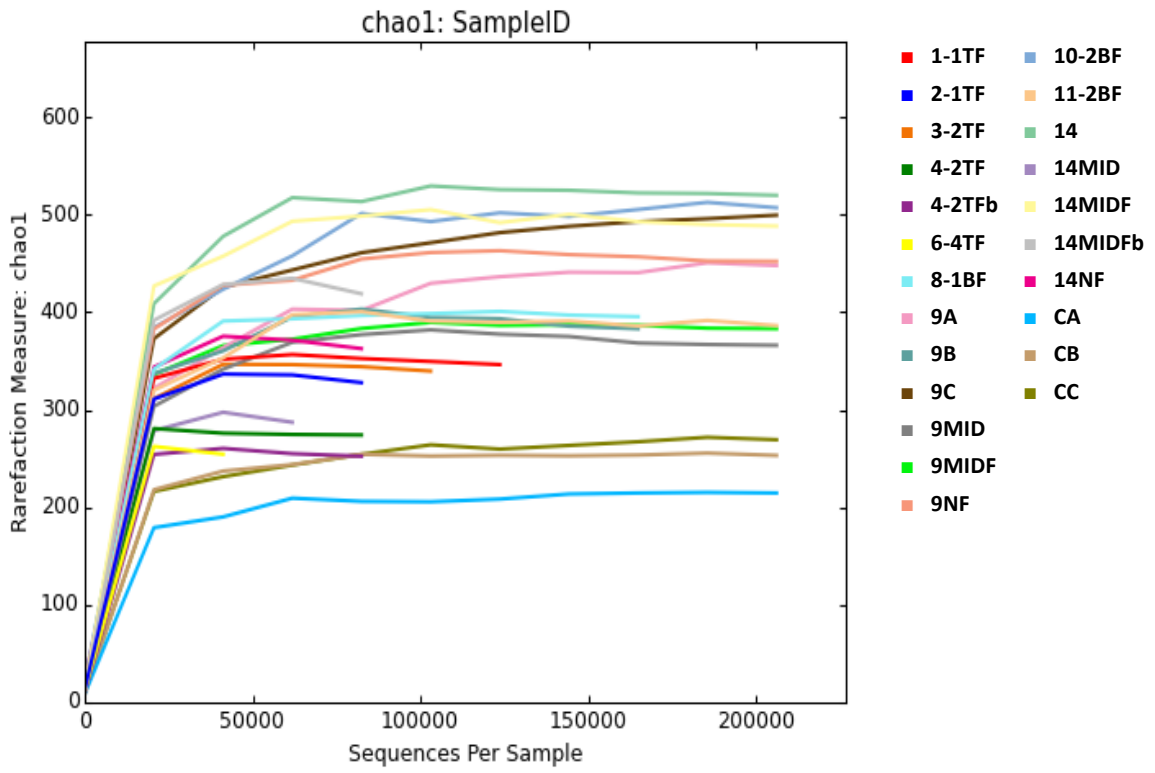

Supplement: 41522_2017_21_MOESM1_ESM.pdf [file 41522_2017_21_MOESM1_ESM.pdf]
